# Supplementary material for: Association of Maternal Prepregnancy Weight and Gestational Weight Gain With Children’s Allergic Diseases
Source: PubMed Central journal article supplement (PMC7489810; doi:10.1001/jamanetworkopen.2020.15643), 2020-09-02
Supplement: jamanetwopen-e2015643-s001.pdf [file jamanetwopen-e2015643-s001.pdf]

## Supplementary Online Content

Chen Y, Zhu J, Lyu J, et al. Association of maternal prepregnancy weight and gestational weight gain with children's allergic diseases. *JAMA Netw Open*. 2020;3(9):e2015643. doi:10.1001/jamanetworkopen.2020.15643

**eTable 1.** GWG and Pre-Pregnancy BMI Characteristics of the Allergen Test Subgroup

**eTable 2.** Associations of IOM Recommendation-Based GWG With the Risk of Childhood Allergic Diseases in the Allergen Test Subgroup

**eTable 3.** Associations of IOM Recommendation-Based GWG With the Risk of Four Single Allergic Diseases Stratified by Children's Age Group

**eTable 4.** Associations of Maternal GWG With Childhood Allergies, According to Maternal Pre-Pregnancy BMI

**eTable 5.** Associations of IOM Recommendation-Based GWG With the Risk of Four Single Allergic Diseases, Stratified by Children's Age Group and Maternal Pre-Pregnancy BMI

**eFigure 1.** Flow Chart of Participants Included for Analysis

**eFigure 2.** Maternal GWG and the Prevalence of Childhood Allergic Diseases According to Pre-Pregnancy BMI

**eAppendix.** Childhood Allergy Questionnaire

This supplementary material has been provided by the authors to give readers additional information about their work.

| <b>eTable 1 GWG and pre-pregnancy BMI characteristics of the allergen test subgroup</b> |                    |                        |                |                 |
|-----------------------------------------------------------------------------------------|--------------------|------------------------|----------------|-----------------|
|                                                                                         | All<br>(n = 8,235) | Allergen Test Subgroup |                | p-value         |
|                                                                                         |                    | No (n =5,637)          | Yes (n =2,598) |                 |
| <b>Pre-pregnancy BMI, kg/m<sup>2</sup>, no (%)</b>                                      |                    |                        |                | <b>.59</b>      |
| Underweight (< 18.5)                                                                    | 1677 (20.4%)       | 1132 (20.1%)           | 545 (21.0%)    |                 |
| Normal (18.5-22.9)                                                                      | 5467 (66.4%)       | 3761 (66.7%)           | 1706 (65.7%)   |                 |
| Overweight (23.0-24.9)                                                                  | 729 (8.9%)         | 504 (8.9%)             | 225 (8.7%)     |                 |
| Obese (≥ 25.0)                                                                          | 362 (4.4%)         | 240 (4.3%)             | 122 (4.7%)     |                 |
| <b>GWG, kg, no (%)</b>                                                                  |                    |                        |                | <b>&lt;.001</b> |
| < 10.0                                                                                  | 1494 (18.1%)       | 1093 (19.4%)           | 401 (15.4%)    |                 |
| 10.0-15.0                                                                               | 4167 (50.6%)       | 2880 (51.1%)           | 1287 (49.5%)   |                 |
| 15.0-25.0.                                                                              | 2148 (26.1%)       | 1394 (24.7%)           | 754 (29.0%)    |                 |
| ≥ 25.0                                                                                  | 426 (5.2%)         | 270 (4.8%)             | 156 (6.0%)     |                 |
| <b>GWG relative to IOM recommendation, no (%)</b>                                       |                    |                        |                | <b>&lt;.001</b> |
| Below IOM                                                                               | 2786 (33.8%)       | 2013 (35.7%)           | 773 (29.8%)    |                 |
| Within IOM                                                                              | 2904 (35.3%)       | 1984 (35.2%)           | 920 (35.4%)    |                 |
| Mild above IOM                                                                          | 1498 (18.2%)       | 981 (17.4%)            | 517 (19.9%)    |                 |
| Extremely above IOM                                                                     | 1047 (12.7%)       | 659 (11.7%)            | 388 (14.9%)    |                 |

Abbreviations: BMI, body mass index; GWG, gestational weight gain; IOM, Institute of Medicine.

χ<sup>2</sup> test performed on categorical variables to compared offspring with allergic disease to offspring without allergic disease.

Below IOM, below the range recommended by the IOM; Within IOM, within the range recommended by the IOM; Mild above IOM, the range is from the IOM recommended threshold to the median of the remaining values; Extremely above IOM, the range is from the median to the maximum.

| <b>eTable 2 Associations of IOM recommendation-based GWG with the risk of childhood allergic diseases in the Allergen Test Subgroup</b> |                               |                 |                         |                 |
|-----------------------------------------------------------------------------------------------------------------------------------------|-------------------------------|-----------------|-------------------------|-----------------|
|                                                                                                                                         | <b>Allergen Test Subgroup</b> |                 |                         |                 |
|                                                                                                                                         | Crude PR (95% CI)             | <i>P</i> -value | Adjusted PR (95% CI)    | <i>P</i> -value |
| <b>GWG relative to IOM recommendation I <sup>a</sup></b>                                                                                |                               |                 |                         |                 |
| Below IOM                                                                                                                               | <b>0.88 (0.81-0.95)</b>       | <b>.001</b>     | <b>0.86 (0.80-0.94)</b> | <b>&lt;.001</b> |
| Within IOM                                                                                                                              | ref                           |                 | ref                     |                 |
| Above IOM                                                                                                                               | <b>1.12 (1.04-1.21)</b>       | <b>.002</b>     | <b>1.10 (1.02-1.19)</b> | <b>.01</b>      |
| <b>GWG relative to IOM recommendation II <sup>b</sup></b>                                                                               |                               |                 |                         |                 |
| Below IOM                                                                                                                               | <b>0.88 (0.81-0.95)</b>       | <b>.001</b>     | <b>0.86 (0.80-0.94)</b> | <b>&lt;.001</b> |
| Within IOM                                                                                                                              | ref                           |                 | ref                     |                 |
| Mild above IOM                                                                                                                          | 1.09 (1.00-1.19)              | .06             | 1.07 (0.98-1.17)        | .13             |
| Extremely above IOM                                                                                                                     | <b>1.17 (1.06-1.29)</b>       | <b>.001</b>     | <b>1.15 (1.05-1.27)</b> | <b>.004</b>     |

Abbreviations: GWG, gestational weight gain; IOM, Institute of Medicine; CI, confidence interval; PR, prevalence ratios.

Adjusted for maternal age at delivery, paternal age at delivery, family income, parity, maternal smoking during pregnancy, maternal alcohol intake during pregnancy, maternal pre-pregnancy body mass index, paternal smoking during pregnancy, family history of allergic disease.

<sup>a</sup> Below IOM, below the range recommended by the IOM; Within IOM, within the range recommended by the IOM; Above IOM, above the range recommended by the IOM.

<sup>b</sup> Below IOM, below the range recommended by the IOM; Within IOM, within the range recommended by the IOM; Mild above IOM, the range is from the IOM recommended threshold to the median of the remaining values; Extremely above IOM, the range is from the median to the maximum.

Significant results are shown in bold font.

| <b>eTable 3 Associations of IOM recommendation-based GWG with the risk of four single allergic diseases stratified by children's age group</b> |                         |                         |                          |                         |                         |                         |                           |                         |
|------------------------------------------------------------------------------------------------------------------------------------------------|-------------------------|-------------------------|--------------------------|-------------------------|-------------------------|-------------------------|---------------------------|-------------------------|
|                                                                                                                                                | <b>Asthma/Wheeze</b>    |                         | <b>Allergic rhinitis</b> |                         | <b>Eczema</b>           |                         | <b>Food/ drug allergy</b> |                         |
|                                                                                                                                                | Crude PR<br>(95% CI)    | Adjusted PR<br>(95% CI) | Crude PR<br>(95% CI)     | Adjusted PR<br>(95% CI) | Crude PR<br>(95% CI)    | Adjusted PR<br>(95% CI) | Crude PR<br>(95% CI)      | Adjusted PR<br>(95% CI) |
| <b>Preschool Children</b>                                                                                                                      |                         |                         |                          |                         |                         |                         |                           |                         |
| <b>GWG I <sup>a</sup></b>                                                                                                                      |                         |                         |                          |                         |                         |                         |                           |                         |
| Below IOM                                                                                                                                      | 0.99 (0.89-1.11)        | 0.99 (0.89-1.12)        | 1.00 (0.91-1.10)         | 1.00 (0.90-1.10)        | <b>0.92 (0.86-0.99)</b> | <b>0.92 (0.86-0.99)</b> | 0.96 (0.82-1.13)          | 0.96 (0.82-1.13)        |
| <i>p</i> -value                                                                                                                                | .91                     | .92                     | .96                      | .95                     | <b>.02</b>              | <b>.02</b>              | .65                       | .63                     |
| Within IOM                                                                                                                                     | ref                     | ref                     | ref                      | ref                     | ref                     | ref                     | ref                       | ref                     |
| Above IOM                                                                                                                                      | <b>1.19 (1.07-1.32)</b> | <b>1.20 (1.08-1.34)</b> | <b>1.12 (1.02-1.23)</b>  | <b>1.13 (1.03-1.24)</b> | 1.02 (0.96-1.09)        | 1.02 (0.96-1.09)        | 1.05 (0.89-1.22)          | 1.07 (0.91-1.25)        |
| <i>p</i> -value                                                                                                                                | <b>.001</b>             | <b>.001</b>             | <b>.02</b>               | <b>.01</b>              | .56                     | .47                     | .58                       | .43                     |
| <b>GWG II <sup>b</sup></b>                                                                                                                     |                         |                         |                          |                         |                         |                         |                           |                         |
| Below IOM                                                                                                                                      | 0.99 (0.89-1.11)        | 0.99 (0.89-1.12)        | 1.00 (0.91-1.10)         | 1.00 (0.90-1.10)        | <b>0.92 (0.86-0.99)</b> | <b>0.92 (0.86-0.99)</b> | 0.96 (0.82-1.13)          | 0.96 (0.82-1.13)        |
| <i>p</i> -value                                                                                                                                | .91                     | .92                     | .96                      | .95                     | <b>.02</b>              | <b>.02</b>              | .65                       | .63                     |
| Within IOM                                                                                                                                     | ref                     | ref                     | ref                      | ref                     | ref                     | ref                     | ref                       | ref                     |
| Mild above IOM                                                                                                                                 | <b>1.16 (1.03-1.31)</b> | <b>1.16 (1.03-1.32)</b> | 1.08 (0.97-1.21)         | 1.09 (0.97-1.22)        | 1.00 (0.93-1.08)        | 1.00 (0.93-1.08)        | 0.97 (0.80-1.17)          | 0.98 (0.81-1.19)        |
| <i>p</i> -value                                                                                                                                | <b>.02</b>              | <b>.02</b>              | .16                      | .15                     | .99                     | .47                     | .72                       | .82                     |
| Extremely above IOM                                                                                                                            | <b>1.22 (1.07-1.39)</b> | <b>1.25 (1.10-1.42)</b> | <b>1.17 (1.04-1.31)</b>  | <b>1.19 (1.06-1.34)</b> | 1.04 (0.96-1.13)        | 1.05 (0.97-1.14)        | 1.15 (0.95-1.40)          | 1.18 (0.97-1.43)        |
| <i>p</i> -value                                                                                                                                | <b>.002</b>             | <b>.001</b>             | <b>.008</b>              | <b>.003</b>             | .29                     | .20                     | .16                       | .10                     |
| <b>Primary School Children</b>                                                                                                                 |                         |                         |                          |                         |                         |                         |                           |                         |
| <b>GWG I <sup>a</sup></b>                                                                                                                      |                         |                         |                          |                         |                         |                         |                           |                         |

|                           |                         |                         |                         |                         |                         |                         |                         |                         |
|---------------------------|-------------------------|-------------------------|-------------------------|-------------------------|-------------------------|-------------------------|-------------------------|-------------------------|
| Below IOM                 | <b>0.80 (0.73-0.88)</b> | <b>0.79 (0.72-0.87)</b> | <b>0.84 (0.79-0.91)</b> | <b>0.84 (0.78-0.90)</b> | <b>0.83 (0.78-0.89)</b> | <b>0.83 (0.78-0.89)</b> | <b>0.79 (0.70-0.90)</b> | <b>0.79 (0.69-0.90)</b> |
| <i>p</i> -value           | <b>&lt;.001</b>         | <b>&lt;.000</b>         | <b>&lt;.001</b>         | <b>&lt;.001</b>         | <b>&lt;.001</b>         | <b>&lt;.001</b>         | <b>&lt;.001</b>         | <b>.001</b>             |
| Within IOM                | ref                     | ref                     | ref                     | ref                     | ref                     | ref                     | ref                     | ref                     |
| Above IOM                 | 1.06 (0.97-1.16)        | 1.06 (0.96-1.16)        | <b>1.07 (1.00-1.14)</b> | 1.07 (1.00-1.14)        | <b>1.07 (1.01-1.14)</b> | <b>1.07 (1.01-1.13)</b> | 1.11 (0.98-1.26)        | 1.10 (0.97-1.24)        |
| <i>p</i> -value           | .20                     | .26                     | <b>.04</b>              | .06                     | <b>.02</b>              | <b>.03</b>              | .09                     | .15                     |
| <b>GWG II<sup>b</sup></b> |                         |                         |                         |                         |                         |                         |                         |                         |
| Below IOM                 | <b>0.80 (0.73-0.88)</b> | <b>0.79 (0.72-0.87)</b> | <b>0.84 (0.79-0.91)</b> | <b>0.84 (0.78-0.90)</b> | <b>0.83 (0.78-0.89)</b> | <b>0.83 (0.78-0.89)</b> | <b>0.79 (0.70-0.90)</b> | <b>0.79 (0.69-0.90)</b> |
| <i>p</i> -value           | <b>&lt;.001</b>         | <b>&lt;.001</b>         | <b>&lt;.001</b>         | <b>&lt;.001</b>         | <b>&lt;.001</b>         | <b>&lt;.001</b>         | <b>&lt;.001</b>         | <b>.001</b>             |
| Within IOM                | ref                     | ref                     | ref                     | ref                     | ref                     | ref                     | ref                     | ref                     |
| Mild above IOM            | 1.00 (0.90-1.12)        | 0.99 (0.89-1.11)        | 1.07 (1.00-1.16)        | 1.07 (0.99-1.15)        | 1.03 (0.96-1.11)        | 1.03 (0.96-1.10)        | 1.12 (0.98-1.29)        | 1.11 (0.96-1.28)        |
| <i>p</i> -value           | .99                     | .86                     | .07                     | .10                     | .74                     | .49                     | .11                     | .16                     |
| Extremely above IOM       | <b>1.15 (1.02-1.28)</b> | <b>1.15 (1.02-1.29)</b> | 1.07 (0.98-1.17)        | 1.06 (0.97-1.16)        | <b>1.13 (1.05-1.21)</b> | <b>1.13 (1.05-1.21)</b> | 1.09 (0.93-1.29)        | 1.07 (0.91-1.27)        |
| <i>p</i> -value           | <b>.02</b>              | <b>.02</b>              | .13                     | .17                     | <b>.001</b>             | <b>.001</b>             | .30                     | .41                     |

Abbreviations: GWG, gestational weight gain; IOM, Institute of Medicine; PR, prevalence ratios; CI, confidence interval.

Adjusted for maternal age at delivery, paternal age at delivery, family income, parity, maternal smoking during pregnancy, maternal alcohol intake during pregnancy, paternal smoking during pregnancy, maternal pre-pregnancy body mass index, family history of allergic disease.

<sup>a</sup> Within IOM, within the range recommended by the IOM; Above IOM, above the range recommended by the IOM.

<sup>b</sup> Within IOM, within the range recommended by the IOM; Mild above IOM, the range is from the IOM recommended threshold to the median of the remaining values; Extremely above IOM, the range is from the median to the maximum.

Significant results are shown in bold font.

| <b>eTable 4 Associations of maternal GWG with childhood allergies, according to maternal pre-pregnancy BMI</b> |                                               |                         |             |                         |             |                         |                       |
|----------------------------------------------------------------------------------------------------------------|-----------------------------------------------|-------------------------|-------------|-------------------------|-------------|-------------------------|-----------------------|
|                                                                                                                | Maternal pre-pregnancy BMI, kg/m <sup>2</sup> |                         |             |                         |             |                         |                       |
|                                                                                                                |                                               | < 18.5                  |             | 18.5-22.9               |             | >23                     |                       |
|                                                                                                                | No of cases                                   | PR (95% CI)             | No of cases | PR (95% CI)             | No of cases | PR (95% CI)             | <i>p</i> -interaction |
| Maternal GWG                                                                                                   |                                               |                         |             |                         |             |                         | .52                   |
| <10                                                                                                            | 429                                           | <b>0.93 (0.88-0.98)</b> | 1696        | 0.94 (0.85-1.04)        | 531         | <b>1.25 (1.08-1.46)</b> |                       |
| 10-15                                                                                                          | 1494                                          | ref                     | 5124        | ref                     | 985         | ref                     |                       |
| 16-24                                                                                                          | 924                                           | <b>1.05 (1.01-1.10)</b> | 2776        | <b>1.09 (1.02-1.16)</b> | 362         | <b>1.11 (1.01-1.23)</b> |                       |
| ≥25                                                                                                            | 195                                           | <b>1.11 (1.04-1.19)</b> | 552         | 1.03 (0.91-1.17)        | 80          | <b>1.25 (1.08-1.46)</b> |                       |

Abbreviations: BMI, body mass index; GWG, gestational weight gain; CI, confidence interval; PR, prevalence ratios.

Adjusted for maternal age at delivery, paternal age at delivery, family income, parity, maternal smoking during pregnancy, maternal alcohol intake during pregnancy, paternal smoking during pregnancy, family history of allergic disease.

Significant results are shown in bold font.

**eTable 5 Associations of IOM recommendation-based GWG with the risk of four single allergic diseases, stratified by children's age group and maternal pre-pregnancy BMI**

|                                              | Asthma/Wheeze           |                         | Allergic rhinitis       |                         | Eczema                  |                         | Food/ drug allergy   |                         |
|----------------------------------------------|-------------------------|-------------------------|-------------------------|-------------------------|-------------------------|-------------------------|----------------------|-------------------------|
|                                              | Crude PR<br>(95% CI)    | Adjusted PR<br>(95% CI) | Crude PR<br>(95% CI)    | Adjusted PR<br>(95% CI) | Crude PR<br>(95% CI)    | Adjusted PR<br>(95% CI) | Crude PR<br>(95% CI) | Adjusted PR<br>(95% CI) |
| <b>Preschool Children</b>                    |                         |                         |                         |                         |                         |                         |                      |                         |
| <b>Maternal pre-pregnancy BMI &lt; 18.5</b>  |                         |                         |                         |                         |                         |                         |                      |                         |
| Below IOM                                    | 1.12 (0.87-1.44)        | 1.13 (0.86-1.43)        | 1.11 (0.90-1.38)        | 1.09 (0.88-1.35)        | 1.02 (0.89-1.18)        | 1.02 (0.89-1.18)        | 1.28 (0.91-1.79)     | 1.28 (0.91-1.80)        |
| <i>p</i> -value                              | .37                     | .41                     | .32                     | .43                     | .74                     | .76                     | .16                  | .16                     |
| Within IOM                                   | ref                     | ref                     | ref                     | ref                     | ref                     | ref                     | ref                  | ref                     |
| Mild above IOM                               | <b>1.48 (1.09-2.02)</b> | <b>1.42 (1.02-2.05)</b> | <b>1.33 (1.01-1.77)</b> | 1.29 (0.96-1.72)        | 1.17 (0.96-1.41)        | 1.14 (0.94-1.39)        | 1.49 (0.93-2.38)     | 1.44 (0.88-2.34)        |
| <i>p</i> -value                              | <b>.01</b>              | <b>.04</b>              | <b>.05</b>              | .09                     | .12                     | .18                     | .10                  | .15                     |
| Extremely above IOM                          | 1.13 (0.76-1.67)        | 1.12 (0.73-1.97)        | 1.25 (0.93-1.69)        | 1.30 (0.96-1.75)        | 1.10 (0.90-1.36)        | 1.14 (0.93-1.39)        | 1.42 (0.87-2.31)     | 1.52 (0.93-2.46)        |
| <i>p</i> -value                              | .54                     | .60                     | .15                     | .09                     | .34                     | .22                     | .16                  | .09                     |
| <b>Maternal pre-pregnancy BMI 18.5- 22.9</b> |                         |                         |                         |                         |                         |                         |                      |                         |
| Below IOM                                    | 0.97 (0.85-1.11)        | 0.97 (0.85-1.11)        | 0.97 (0.86-1.09)        | 0.97 (0.86-1.09)        | <b>0.90 (0.83-0.98)</b> | <b>0.90 (0.83-0.98)</b> | 0.92 (0.76-1.12)     | 0.92 (0.76-1.12)        |
| <i>p</i> -value                              | .69                     | .68                     | .59                     | .59                     | <b>.01</b>              | <b>&lt;.001</b>         | .41                  | 0.42                    |
| Within IOM                                   | ref                     | ref                     | ref                     | ref                     | ref                     | ref                     | ref                  | ref                     |
| Mild above IOM                               | 1.08 (0.92-1.25)        | 1.07 (0.92-1.25)        | 1.05 (0.92-1.20)        | 1.05 (0.92-1.20)        | 0.96 (0.87-1.05)        | 0.96 (0.87-1.05)        | 0.87 (0.69-1.11)     | 0.89 (0.70-1.13)        |
| <i>p</i> -value                              | .35                     | .38                     | .48                     | .47                     | .36                     | .35                     | .27                  | .33                     |
| Extremely above IOM                          | <b>1.27 (1.08-1.49)</b> | <b>1.28 (1.09-1.51)</b> | <b>1.19 (1.02-1.37)</b> | <b>1.20 (1.04-1.39)</b> | 1.06 (0.96-1.17)        | 1.07 (0.96-1.18)        | 1.18 (0.86-1.45)     | 1.14 (0.88-1.48)        |

| <b>eTable 5, cont</b>                     |                  |                  |                  |                  |                  |                  |                  |                         |
|-------------------------------------------|------------------|------------------|------------------|------------------|------------------|------------------|------------------|-------------------------|
| <i>p</i> -value                           | <b>.004</b>      | <b>.003</b>      | <b>.02</b>       | <b>.01</b>       | .27              | .22              | .75              | .31                     |
| <b>Maternal pre-pregnancy BMI &gt; 23</b> |                  |                  |                  |                  |                  |                  |                  |                         |
| Below IOM                                 | 0.76 (0.46-1.24) | 0.79 (0.48-1.29) | 0.88 (0.58-1.31) | 0.91 (0.61-1.37) | 0.72 (0.51-1.00) | 0.73 (0.52-1.02) | 0.44 (0.18-1.05) | <b>0.36 (0.14-0.97)</b> |
| <i>p</i> -value                           | .27              | .34              | .52              | .66              | .51              | .07              | .06              | <b>.04</b>              |
| Within IOM                                | ref              | ref              | ref              | ref              | ref              | ref              | ref              | ref                     |
| Mild above IOM                            | 1.20 (0.89-1.61) | 1.25 (0.93-1.69) | 0.99 (0.74-1.33) | 1.04 (0.77-1.40) | 1.02 (0.85-1.23) | 1.04 (0.86-1.25) | 0.91 (0.58-1.43) | 0.94 (0.60-1.47)        |
| <i>p</i> -value                           | .23              | .10              | .71              | .79              | .86              | .68              | .69              | .77                     |
| Extremely above IOM                       | 1.13 (0.85-1.51) | 1.17 (0.87-1.56) | 1.10 (0.84-1.42) | 1.13 (0.86-1.47) | 0.99 (0.83-1.19) | 1.00 (0.84-1.20) | 1.01 (0.68-1.52) | 1.02 (0.68-1.53)        |
|                                           | .41              | .30              | .50              | .38              | .92              | 1.00             | .95              | .92                     |



**eTable 5 Associations of IOM recommendation-based GWG with the risk of four single allergic diseases, stratified by children's age group and maternal pre-pregnancy BMI**

**Primary School Children**

**Maternal pre-pregnancy BMI < 18.5**

|                     |                         |                         |                         |                         |                         |                         |                  |                  |
|---------------------|-------------------------|-------------------------|-------------------------|-------------------------|-------------------------|-------------------------|------------------|------------------|
| Below IOM           | <b>0.65 (0.53-0.81)</b> | <b>0.63 (0.51-0.79)</b> | <b>0.80 (0.69-0.92)</b> | <b>0.79 (0.68-0.92)</b> | <b>0.82 (0.72-0.92)</b> | <b>0.82 (0.72-0.93)</b> | 0.73 (0.56-0.95) | 0.72 (0.56-0.94) |
| <i>p</i> -value     | <b>&lt;.001</b>         | <b>&lt;.001</b>         | <b>.002</b>             | <b>.003</b>             | <b>.001</b>             | <b>.002</b>             | .02              | .02              |
| Within IOM          | ref                     | ref                     | ref                     | ref                     | ref                     | ref                     | ref              | ref              |
| Mild above IOM      | 1.01 (0.79-1.30)        | 1.01 (0.78-1.31)        | 1.09 (0.92-1.30)        | 1.09 (0.92-1.30)        | 0.96 (0.81-1.13)        | 0.96 (0.81-1.14)        | 1.13 (0.82-1.54) | 1.13 (0.82-1.54) |
| <i>p</i> -value     | .92                     | .99                     | .30                     | .33                     | .62                     | .64                     | .46              | .46              |
| Extremely above IOM | 1.03 (0.79-1.35)        | 1.02 (0.77-1.34)        | 1.09 (0.91-1.31)        | 1.05 (0.86-1.28)        | 1.11 (0.95-1.29)        | 1.07 (0.91-1.26)        | 1.24 (0.90-1.71) | 1.15 (0.83-1.61) |
| <i>p</i> -value     | .81                     | .91                     | .36                     | .64                     | .18                     | .40                     | .18              | .41              |

**Maternal pre-pregnancy BMI 18.5- 22.9**

|                     |                         |                         |                         |                         |                         |                         |                         |                         |
|---------------------|-------------------------|-------------------------|-------------------------|-------------------------|-------------------------|-------------------------|-------------------------|-------------------------|
| Below IOM           | <b>0.82 (0.73-0.92)</b> | <b>0.81 (0.72-0.91)</b> | <b>0.84 (0.78-0.92)</b> | <b>0.84 (0.77-0.91)</b> | <b>0.81 (0.75-0.88)</b> | <b>0.81 (0.75-0.88)</b> | <b>0.78 (0.66-0.91)</b> | <b>0.78 (0.66-0.91)</b> |
| <i>p</i> -value     | <b>&lt;.001</b>         | <b>&lt;.001</b>         | <b>&lt;.001</b>         | <b>&lt;.001</b>         | <b>&lt;.001</b>         | <b>&lt;.001</b>         | <b>.002</b>             | <b>.002</b>             |
| Within IOM          | ref                     | ref                     | ref                     | ref                     | ref                     | ref                     | ref                     | ref                     |
| Mild above IOM      | 1.00 (0.87-1.14)        | 0.98 (0.85-1.12)        | <b>1.10 (1.00-1.20)</b> | 1.09 (0.99-1.20)        | 1.06 (0.98-1.15)        | 1.05 (0.97-1.14)        | <b>1.25 (1.05-1.48)</b> | <b>1.21 (1.02-1.44)</b> |
| <i>p</i> -value     | .97                     | .75                     | <b>.04</b>              | .07                     | .16                     | .25                     | <b>.01</b>              | <b>.03</b>              |
| Extremely above IOM | 1.09 (0.94-1.27)        | 1.07 (0.92-1.25)        | 0.98 (0.87-1.11)        | 0.97 (0.86-1.10)        | 1.09 (0.99-1.20)        | 1.09 (0.99-1.21)        | 1.00 (0.80-1.26)        | 0.97 (0.76-1.23)        |
| <i>p</i> -value     | .26                     | .39                     | .80                     | .66                     | .05                     | .07                     | .98                     | .78                     |

**Maternal pre-pregnancy BMI > 23**

|                 |                  |                  |                  |                  |                  |                  |                  |                  |
|-----------------|------------------|------------------|------------------|------------------|------------------|------------------|------------------|------------------|
| Below IOM       | 1.05 (0.71-1.55) | 1.04 (0.70-1.55) | 0.84 (0.59-1.18) | 0.85 (0.60-1.20) | 1.00 (0.75-1.34) | 1.00 (0.74-1.34) | 1.26 (0.82-1.96) | 1.30 (0.82-2.05) |
| <i>p</i> -value | .80              | .86              | .31              | .35              | .98              | .97              | .20              | .15              |

|                     |                         |                         |                         |                         |                         |                         |                  |                  |
|---------------------|-------------------------|-------------------------|-------------------------|-------------------------|-------------------------|-------------------------|------------------|------------------|
| Within IOM          | ref                     | ref                     | ref                     | ref                     | ref                     | ref                     | ref              | ref              |
| Mild above IOM      | 1.17 (0.87-1.57)        | 1.18 (0.87-1.60)        | 1.09 (0.86-1.37)        | 1.08 (0.86-1.37)        | 1.18 (0.96-1.45)        | 1.19 (0.96-1.47)        | 0.81 (0.53-1.24) | 0.88 (0.57-1.37) |
| <i>p</i> -value     | .47                     | .28                     | .49                     | .50                     | .13                     | .12                     | .33              | .57              |
| Extremely above IOM | <b>1.58 (1.20-2.07)</b> | <b>1.65 (1.25-2.17)</b> | <b>1.42 (1.15-1.74)</b> | <b>1.46 (1.18-1.80)</b> | <b>1.46 (1.21-1.77)</b> | <b>1.52 (1.25-1.85)</b> | 1.26 (0.86-1.84) | 1.39 (0.94-2.06) |
| <i>p</i> -value     | <b>&lt;.001</b>         | <b>&lt;.001</b>         | <b>.001</b>             | <b>&lt;.001</b>         | <b>&lt;.001</b>         | <b>&lt;.001</b>         | .23              | .10              |

Abbreviations: BMI, body mass index; IOM, Institute of Medicine; PR, prevalence ratios; CI, confidence interval.

<sup>a</sup> Adjusted for maternal age at delivery, paternal age at delivery, family income, parity, maternal smoking during pregnancy, maternal alcohol intake during pregnancy, maternal pre-pregnancy body mass index, paternal smoking during pregnancy, family history of allergic disease .

<sup>b</sup> Within IOM, within the range recommended by the IOM; Mild above IOM, the range is from the IOM recommended threshold to the median of the remaining values; Extremely above IOM, the range is from the median to the maximum. Significant results are shown in bold font.

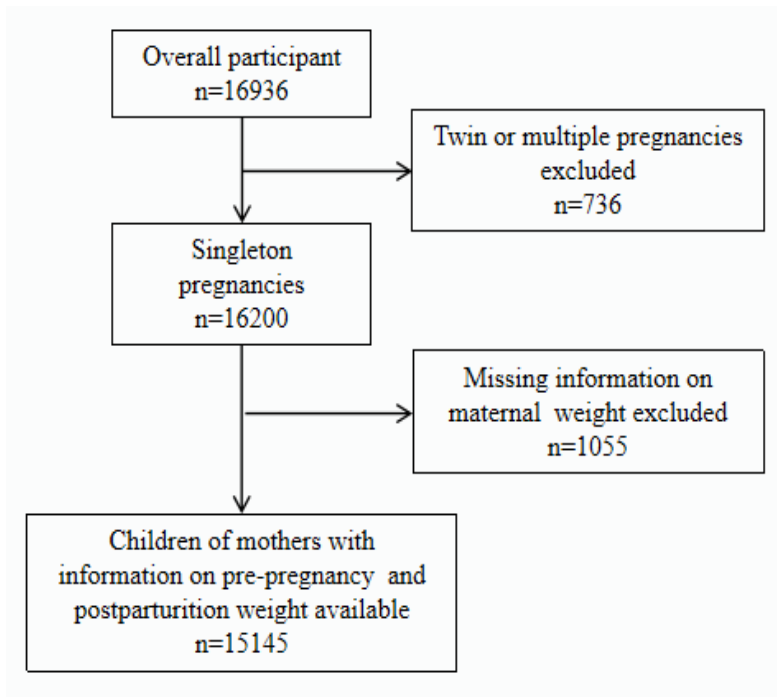

**eFigure 1 Flow chart of participants included for analysis**

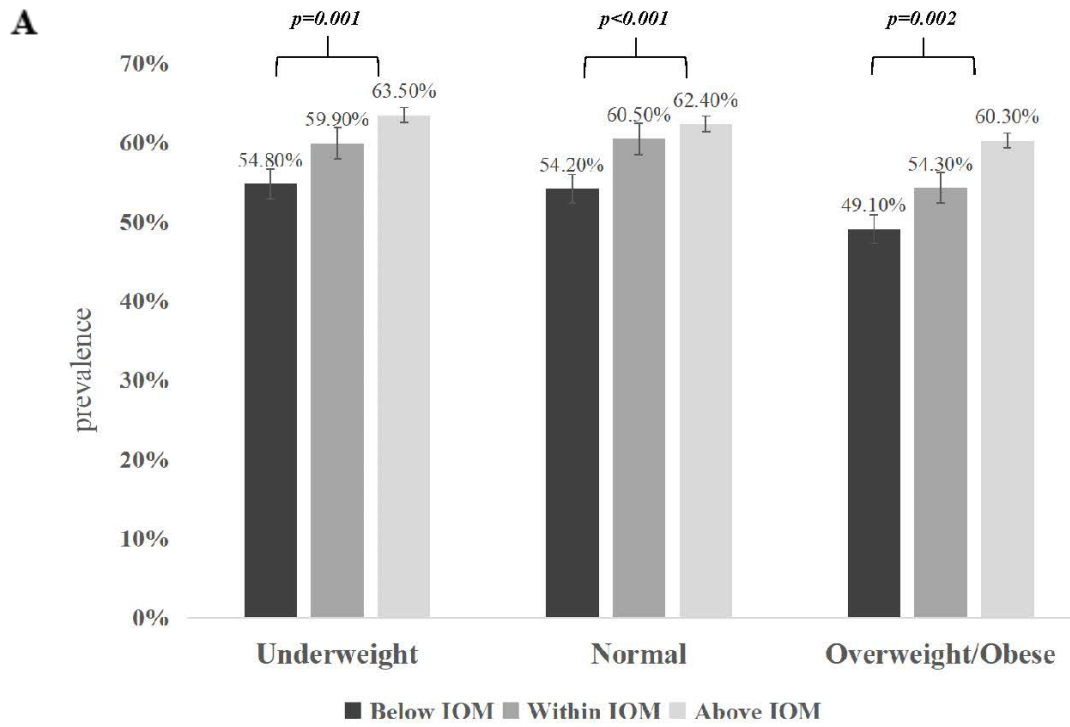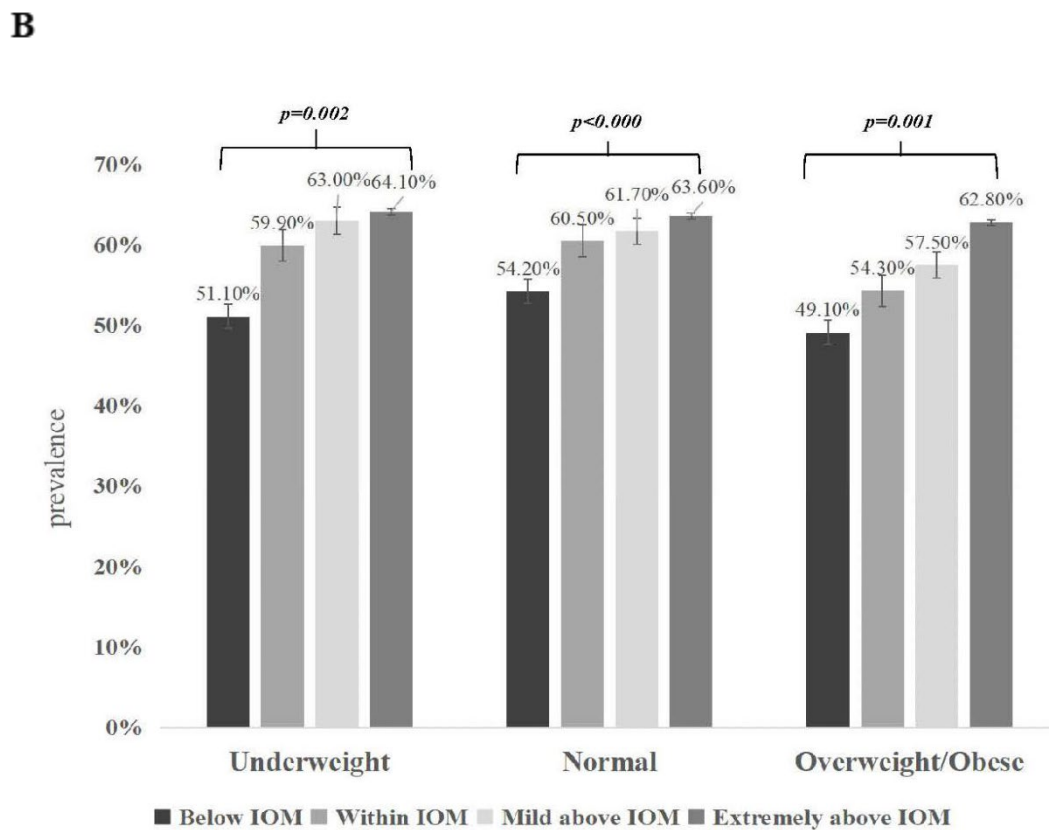

**eFigure 2 Maternal GWG and the prevalence of childhood allergic diseases according to pre-pregnancy BMI**

Abbreviation: BMI, body mass index; GWG, gestational weight gain; IOM, Institute of Medicine.

<sup>a</sup> Underweight, pre-pregnancy body mass index below 18.5; Normal, pre-pregnancy body mass index between 18.5 and 23; Overweight/obese, pre-pregnancy body mass index above 23.

<sup>b</sup> Below IOM, below the range recommended by the IOM; Within IOM, within the range recommended by the IOM; Mild above IOM, the range is from the IOM recommended threshold to the median of the remaining values; Extremely above IOM, the range is from the median to the maximum.

## eAppendix. CHILDHOOD ALLERGY QUESTIONNAIRE

1. Has your child ever been diagnosed with asthma?

yes  no

2. Has your child experienced any wheezing, breathing difficulties, or whistling in the chest in the last 12 months?

yes  no

3. Has your child ever been diagnosed with allergic rhinitis?

yes  no

4. Has your child ever sneezing, runny nose, stuffy, or itchy in the last 12 months not due to having a cold or flu?

yes  no

4a. If YES, has this nose problem been accompanied by itchy–watery eyes?

yes  no

5. In the past 12 months, has your child had “hay fever”?

yes  no

6. Has your child had repeated skin itching or a rash on the bent side of the elbow or knee joint in the last 12 months?

yes  no

7. Has your child ever been diagnosed with eczema?

yes  no

8. Has your child had a history of food allergies (redness, swelling, rash, abdominal pain, etc. within 2 hours after eating)?

yes  no

9. Has your child ever been diagnosed by a doctor with a drug allergy?

yes  no

\* All questions were translated into Chinese when used.

# To identify ever asthma, the question was asked: “Has your child ever been diagnosed with asthma?”, and ever wheezing was defined by question: “Has your child experienced any wheezing, breathing difficulties or whistling in the chest in the last 12 months?”. Question utilized to identify ever allergic rhinitis was: “Has your child ever been diagnosed with allergic rhinitis?” and three questions was combined to determine current allergic rhinitis: “Has your child ever sneezing, runny nose, stuffy, itchy in the last 12 months not due to having a cold or flu?”, “If YES, has this nose problem been accompanied by itchy–watery eyes?”, “In the past 12 months, has your child had “hay fever”?”. Ever eczema was confirmed by question: “Has your child ever been diagnosed with eczema?” and current eczema was determined by “Has your child had repeated itching or rash on the bent side of the elbow or knee joint in the last 12 months?”. Food allergy was ascertained by the positive answer to question: “Does your child have a history of food allergies (redness, swelling, rash, abdominal pain, etc. within 2 hours after eating)?”. Drug allergy was determined by question: “Has your child ever been diagnosed by a doctor with a drug allergy?” The screened asthma/wheezing, allergic rhinitis and eczema were determined by ever diagnosis plus current symptoms. Children who were screened out one of above five types of allergies were considered to be screened positive for allergic diseases.
